# Supplementary material for: Induction of Macrophage Function in Human THP-1 Cells Is Associated with Rewiring of MAPK Signaling and Activation of MAP3K7 (TAK1) Protein Kinase
Source: PubMed Central journal article supplement (PMC4811913; doi:10.3389/fcell.2016.00021), 2016-03-30
Supplement: Supplemental_Figures.pdf [file Supplemental_Figures.pdf]

## Induction of Macrophage Function in Human THP-1 Cells is Associated with Rewiring of MAPK Signaling and Activation of MAP3K7 (TAK1) Protein Kinase

Erik Richter, Katharina Ventz, Manuela Harms, Jörg Mostertz and Falko Hochgräfe\*

\*Correspondence: falko.hochgraefe@uni-greifswald.de

### Supplemental Figure 1

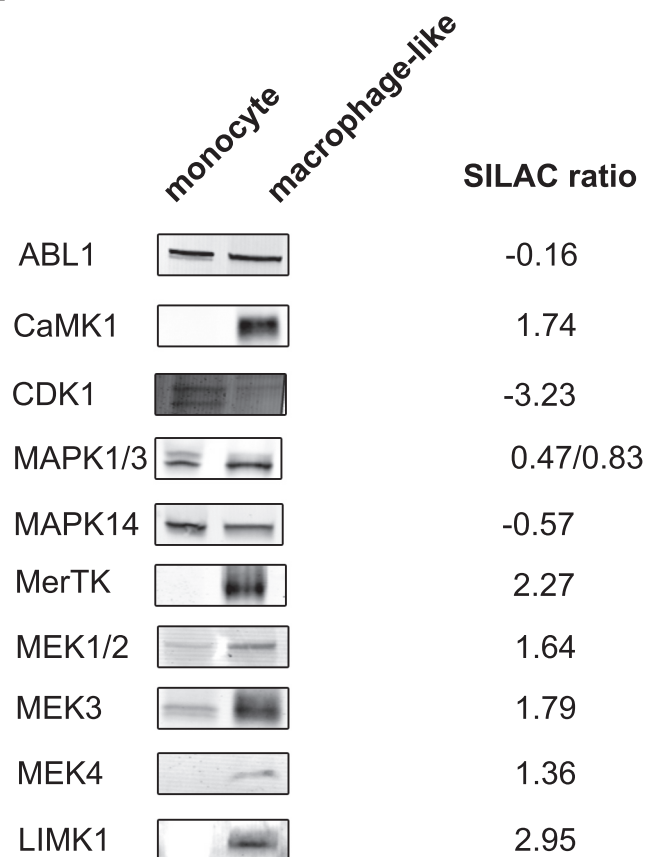

**Supplemental Figure 1:** Western blot analysis of selected protein kinase. Corresponding  $\log_2$ -SILAC ratios (macrophage-like / monocyte) are indicated.

## Supplemental Figure 2

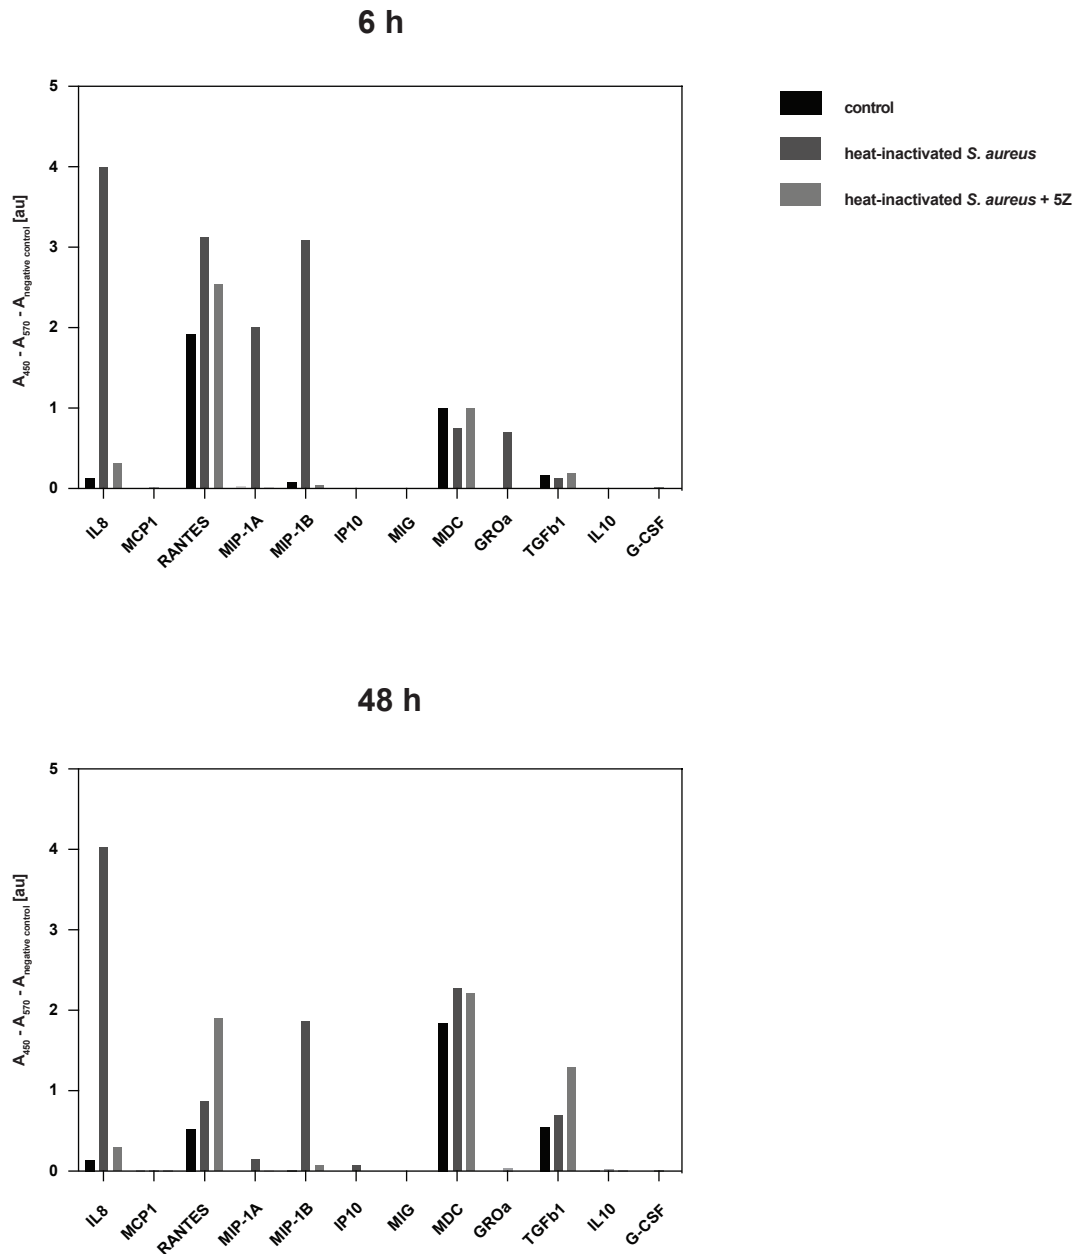

**Supplemental Figure 2:** Enzyme-linked immunosorbent assays of 12 chemokines in the supernatant of differentiated THP-1 cells that were either left untreated or treated with heat-inactivated *S. aureus* in the presence or absence of the TAK1-selective inhibitor 5Z.

## Supplemental Figure 3

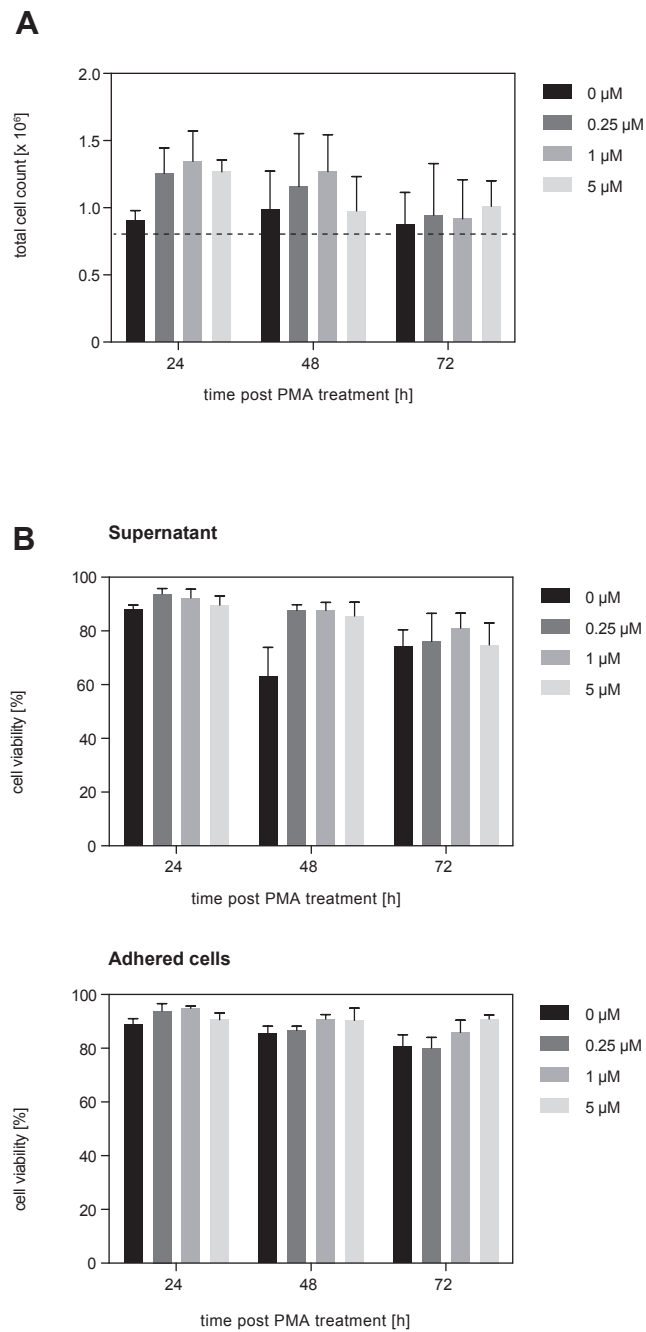

**Supplemental Figure 3:** Total cell counts and cell viability following treatment of THP-1 cells with PMA and 0 to 5  $\mu$ M of the TAK1-selective inhibitor 5Z for 24, 48 and 72 hours. **A:** Total cell numbers, i.e. the sum of adhered cells and cells in the cell culture supernatant as represented in Figure 6G. The dashed line indicates the number of seeded cells ( $9 \times 10^5$ ) at  $t = 0$  h. **B:** Cell viability of THP-1 cells in the cell culture supernatant and adherent cells corresponding to cell counts in Figure 6G.
